# Supplementary material for: 50 years of amino acid hydrophobicity scales: revisiting the capacity for peptide classification
Source: Biol Res. 2016 Jul 4;49:31. doi: 10.1186/s40659-016-0092-5 (PMC4932767; doi:10.1186/s40659-016-0092-5)
Supplement: Supplementary file 5 — 10.1186/s40659-016-0092-5 Amino acid pattern of length 4. Given is the sequence pool 1 (column 1) and sequence pool 2 (column 2), the separation capacity between pools based on hydrophobicity (column 3), the maximal difference in the frequency of occurrence (FO) pattern value (column 4), the minimal difference in the FO pattern value (column 5), the number of overrepresented pattern from pool1 in contrast to pool2 (column 6) and the top 5 of identified pattern of length 4. [file 40659_2016_92_MOESM5_ESM.xlsx]

## Sheet: FO
pool1	pool2	separation	max_FO_difference	min_FO_difference	num_of_pattern	first	second	third	fourth	fifth
dc-helix	dc-helix	0	0	0	0	0,0,	0,0,	0,0,	0,0,	0,0,
dc-helix	dc-random	0.0935532	0.00046779	1.183e-05	29674	0,00046779,ALAA	0,00045599,AALA	0,0004173,LAAA	0,0003582,ALLE	0,0003345,EALL
dc-helix	dc-sheet	0.120371	0.00045079	1.183e-05	34455	0,00045079,ALAA	0,000381,AALA	0,00037979,LAAA	0,0003432,LAEL	0,0003313,VEAL
dc-helix	dd-helix	0.0715318	0.00022224	1.052e-05	25935	0,00022224,LELA	0,00022027,ELVE	0,0002189,VEAL	0,0002071,LLLA	0,0002051,EALL
dc-helix	dd-random	0.162593	0.00048114	1.169e-05	30952	0,00048114,ALAA	0,00046934,AALA	0,00041014,LAAA	0,0003787,ALLE	0,00035104,AAAL
dc-helix	dd-sheet	0.0996618	0.00047494	1.183e-05	29207	0,00047494,AALA	0,00046468,ALAA	0,00041574,LAAA	0,00035664,AAAL	0,0003313,AEAL
dc-helix	no-helix	0.0651555	0.00047107	1.034e-05	22897	0,00047107,ALAA	0,00045927,AALA	0,00039378,LAAA	0,00035354,AAAL	0,0003221,ALLE
dc-helix	no-random	0.686117	0.0003787	1.183e-05	40156	0,0003787,ALLE	0,0003787,AAAL	0,0003432,LAEL	0,0003313,VEAL	0,0003313,LAAL
dc-helix	no-sheet	0.0499723	0.0003238	1.026e-05	23927	0,0003238,AALA	0,00027138,LLLA	0,00025958,ELVE	0,0002536,ALLE	0,0002393,ALAA
dc-helix	all	0.0725499	0.0003852	1.015e-05	16528	0,0003852,ALAA	0,0003323,AALA	0,0003021,LAAA	0,00028421,ALLE	0,00027263,EALL
dc-helix	random	0.273051	0.00049348	1.159e-05	25740	0,00049348,ALAA	0,00048168,AALA	0,00041738,LAAA	0,00036338,ALLE	0,00033786,AAAL
dc-helix	s-helix	0.30363	0.0001852	1.03e-05	16562	0,0001852,LLLA	0,0001804,ALAA	0,0001711,ELVE	0,0001662,AALA	0,0001653,ALLE
dc-helix	s-sheet	0.224017	0.0004804	1.183e-05	28651	0,0004804,ALAA	0,0004686,AALA	0,0004094,LAAA	0,0003503,ALLE	0,0003313,AEAL
dc-helix	krtm-helix	0.966135	0.0003787	1.183e-05	38673	0,0003787,ALLE	0,000355,EALL	0,0003531,ALAA	0,0003432,LAEL	0,0003313,VEAL
dc-helix	tm-helix	0.373979	0.0003388	1.056e-05	26654	0,0003388,ALLE	0,00031634,AEAL	0,0003151,EALL	0,000314512,ELAE	0,00031135,VEAL
dc-helix	krtm-sheet	0.984982	0.0005088	1.183e-05	40659	0,0005088,ALAA	0,000497,AALA	0,0003787,ALLE	0,0003787,AAAL	0,000355,EALL
dc-helix	tm-sheet	0.293601	0.00044901	1.052e-05	33271	0,00044901,AALA	0,00043682,ALAA	0,0003787,ALLE	0,000355,EALL	0,00035471,AAAL
dc-random	dc-helix	0.0935532	0.0027735	1.102e-05	21654	0,0027735,GSSG	0,00157533,SSGS	0,001435,SGSS	0,0007792,HHHH	0,0003336,EEEE
dc-random	dc-random	0	0	0	0	0,0,	0,0,	0,0,	0,0,	0,0,
dc-random	dc-sheet	0.271781	0.002809	2.05e-05	27508	0,002809,GSSG	0,001599,SSGS	0,001435,SGSS	0,0007792,HHHH	0,0003691,EEEE
dc-random	dd-helix	0.0980993	0.00277153	1.06e-05	20583	0,00277153,GSSG	0,00158651,SSGS	0,001435,SGSS	0,0007792,HHHH	0,00030665,EEEE
dc-random	dd-random	0.116598	0.0021176	1.24e-05	23909	0,0021176,GSSG	0,0012118,SSGS	0,0011308,SGSS	0,0006686,HHHH	0,0003691,EEEE
dc-random	dd-sheet	0.151778	0.00276488	1.11e-05	23648	0,00276488,GSSG	0,00157694,SSGS	0,00134675,SGSS	0,0007792,HHHH	0,00034704,EEEE
dc-random	no-helix	0.0818563	0.0025008	1.12e-05	20977	0,0025008,GSSG	0,001404,SSGS	0,00124,SGSS	0,00070373,HHHH	0,00033766,EEEE
dc-random	no-random	0.763027	0.0024687	2.05e-05	31761	0,0024687,GSSG	0,001599,SSGS	0,001435,SGSS	0,0007792,HHHH	0,0003691,EEEE
dc-random	no-sheet	0.0371511	0.0024144	1.0876e-05	24601	0,0024144,GSSG	0,0013969,SSGS	0,0012136,SGSS	0,00071183,HHHH	0,00034023,EEEE
dc-random	all	0.0782618	0.0027242	1.044e-05	22278	0,0027242,GSSG	0,00151663,SSGS	0,00137443,SGSS	0,00076709,HHHH	0,00034245,EEEE
dc-random	random	0.276566	0.001558	1.029e-05	25798	0,001558,GSSG	0,0008587,SSGS	0,0007764,SGSS	0,0004065,HHHH	0,0002721,EEEE
dc-random	s-helix	0.324693	0.00279462	1.01e-05	27715	0,00279462,GSSG	0,00158462,SSGS	0,001432603,SGSS	0,000774405,HHHH	0,00033314,EEEE
dc-random	s-sheet	0.287011	0.002809	1.103e-05	24877	0,002809,GSSG	0,0015706,SSGS	0,00139241,SGSS	0,0007792,HHHH	0,0003549,EEEE
dc-random	krtm-helix	0.981826	0.002809	2.05e-05	30873	0,002809,GSSG	0,001599,SSGS	0,001435,SGSS	0,0007792,HHHH	0,0003691,EEEE
dc-random	tm-helix	0.57887	0.00279404	1.0524e-05	28306	0,00279404,GSSG	0,00157905,SSGS	0,00142004,SGSS	0,0007792,HHHH	0,000359124,EEEE
dc-random	krtm-sheet	0.977473	0.002809	2.05e-05	31863	0,002809,GSSG	0,001435,SGSS	0,0011984,SSGS	0,0007792,HHHH	0,0003691,EEEE
dc-random	tm-sheet	0.319821	0.00273702	1.004e-05	26342	0,00273702,GSSG	0,001479,SSGS	0,00138701,SGSS	0,00075521,HHHH	0,0003691,EEEE
dc-sheet	dc-helix	0.120371	0.0003126	1.068e-05	13609	0,0003126,VLLV	0,0003126,LSLS	0,0002901,VEVD	0,00028893,LGGA	0,00027827,VVTL
dc-sheet	dc-random	0.271781	0.0003481	1.35e-05	13833	0,0003481,VLLV	0,0003481,LSLS	0,0003481,LGGA	0,0002901,VVVA	0,0002901,VVTL
dc-sheet	dc-sheet	0	0	0	0	0,0,	0,0,	0,0,	0,0,	0,0,
dc-sheet	dd-helix	0.213731	0.00032312	1.16e-05	13376	0,00032312,VLLV	0,0002901,VVGL	0,0002901,VEVD	0,0002901,TIEI	0,0002901,NVTS
dc-sheet	dd-random	0.289154	0.0003481	3.035e-05	13271	0,0003481,VLLV	0,00032044,LSLS	0,0002901,VVTL	0,0002901,TIEI	0,0002901,NVTS
dc-sheet	dd-sheet	0.14671	0.0002901	1.389e-05	13501	0,0002901,ATLG	0,00028191,LSLS	0,00028191,LGGA	0,00026804,VEVD	0,00026804,TIEI
dc-sheet	no-helix	0.188114	0.00031037	1.399e-05	13894	0,00031037,LGGA	0,000283811,RGVV	0,00027752,TIEI	0,00027123,DTVV	0,00026635,LSLS
dc-sheet	no-random	0.670822	0.0003481	5.801e-05	13629	0,0003481,VLLV	0,0002901,VVGL	0,0002901,VVED	0,0002901,VLVE	0,0002901,VLTV
dc-sheet	no-sheet	0.200599	0.00032885	1.01e-05	13658	0,00032885,VLLV	0,00031923,LGGA	0,0003096,LSLS	0,0002901,TVEV	0,0002901,TIEI
dc-sheet	all	0.231088	0.00029965	1.18e-05	13926	0,00029965,LGGA	0,00029238,VLLV	0,00029238,LSLS	0,00027799,TVEV	0,00027799,TIEI
dc-sheet	random	0.529357	0.0003481	1.206e-05	14308	0,0003481,VLLV	0,000342995,LSLS	0,00029705,LGGA	0,0002901,VLVE	0,0002901,TIEI
dc-sheet	s-helix	0.567534	0.00032892	1.006e-05	14038	0,00032892,VLLV	0,00032413,LSLS	0,00031933,LGGA	0,0002901,VEVD	0,000287703,TVEV
dc-sheet	s-sheet	0.435073	0.00030551	1.542e-05	13605	0,00030551,LGGA	0,00026291,VLLV	0,00024751,VGLE	0,00023331,VVTL	0,00023331,RGVV
dc-sheet	krtm-helix	0.96905	0.0003481	1.83e-05	12925	0,0003481,LGGA	0,0002901,VVVA	0,0002901,VVTL	0,0002901,VVED	0,0002901,VGLE
dc-sheet	tm-helix	0.565841	0.0002901	1.13e-05	13016	0,0002901,VVED	0,0002901,VEVD	0,0002901,TVEV	0,0002901,LEVE	0,000285112,VGLE
dc-sheet	krtm-sheet	0.977265	0.0003481	5.801e-05	13845	0,0003481,VLLV	0,0003481,LSLS	0,0003481,LGGA	0,0002901,VVVA	0,0002901,VVTL
dc-sheet	tm-sheet	0.415364	0.0003481	1.002e-05	13651	0,0003481,VLLV	0,0002901,VVVA	0,0002901,VVED	0,0002901,VLVE	0,0002901,VLTV
dd-helix	dc-helix	0.0715318	0.0001729	1.18e-05	26480	0,0001729,EELL	0,00015313,LEEE	0,0001394,LTDE	0,00013807,LEGE	0,00012823,ELAQ
dd-helix	dc-random	0.0980993	0.00032119	1.249e-05	29088	0,00032119,ALAA	0,0003167,LALA	0,0003043,LAAL	0,00028379,AALA	0,0002793,ALAD
dd-helix	dc-sheet	0.213731	0.0003622	1.249e-05	35814	0,0003622,EELL	0,0003372,LEEL	0,00030419,ALAA	0,0002998,ALAD	0,00027919,LALA
dd-helix	dd-helix	0	0	0	0	0,0,	0,0,	0,0,	0,0,	0,0,
dd-helix	dd-random	0.0765754	0.0003372	1.16e-05	30710	0,0003372,LALA	0,00033454,ALAA	0,00029714,AALA	0,00028189,LEEL	0,00027923,EELL
dd-helix	dd-sheet	0.0582814	0.00034014	1.167e-05	29561	0,00034014,EELL	0,00031808,ALAA	0,00031514,LEEL	0,00031514,LALA	0,00030274,LAAL
dd-helix	no-helix	0.0874658	0.00034962	1.196e-05	21926	0,00034962,EELL	0,00032447,ALAA	0,00031204,LALA	0,00029336,LAAL	0,00029318,LEEL
dd-helix	no-random	0.648862	0.0003622	1.249e-05	41579	0,0003622,EELL	0,0003372,LEEL	0,0003372,LALA	0,0003248,LAAL	0,0002998,ALAE
dd-helix	no-sheet	0.0444604	0.0002371	1.02e-05	23148	0,0002371,EELL	0,0002121,LALA	0,00017668,LAQA	0,0001747,ALAE	0,00017093,GLAL
dd-helix	all	0.0746889	0.00027256	1.0067e-05	20092	0,00027256,EELL	0,0002386,ALAA	0,0002282,LEEL	0,00021985,ALAD	0,0002161,LALA
dd-helix	random	0.363975	0.00034688	1.14e-05	24823	0,00034688,ALAA	0,00032699,LALA	0,00031625,EELL	0,00030948,AALA	0,00029125,LEEL
dd-helix	s-helix	0.395111	0.0001728	1.0093e-05	26318	0,0001728,EELL	0,00015812,LTDE	0,0001392,ALAD	0,00013894,LTEE	0,0001382,LALA
dd-helix	s-sheet	0.367078	0.0003622	1.078e-05	32144	0,0003622,EELL	0,0003338,ALAA	0,000323,LEEL	0,0002998,ALAD	0,0002964,LAAL
dd-helix	krtm-helix	0.948643	0.0003622	1.249e-05	40077	0,0003622,EELL	0,0003372,LEEL	0,0002998,ALAD	0,0002748,EALA	0,0002498,VEEL
dd-helix	tm-helix	0.352653	0.0003622	1.002e-05	28116	0,0003622,EELL	0,00031725,LEEL	0,00027985,ALAD	0,00026987,ALAE	0,00025984,EALA
dd-helix	krtm-sheet	0.968914	0.0003622	1.249e-05	42012	0,0003622,EELL	0,0003622,ALAA	0,0003372,LEEL	0,0003372,LALA	0,0003248,LAAL
dd-helix	tm-sheet	0.369205	0.0003622	1.249e-05	33892	0,0003622,EELL	0,0003372,LEEL	0,00030081,LAAL	0,0002998,ALAE	0,00029022,ALAA
dd-random	dc-helix	0.162593	0.0006559	1.197e-05	22193	0,0006559,GSSG	0,00036353,SSGS	0,0003042,SGSS	0,00022523,SSGL	0,0001936,SDGS
dd-random	dc-random	0.116598	0.0001731	1.43e-05	18057	0,0001731,SDGS	0,0001731,LTEL	0,0001659,PVVL	0,0001659,PLGG	0,0001659,PAES
dd-random	dc-sheet	0.289154	0.0006914	2.23e-05	22647	0,0006914,GSSG	0,0003872,SSGS	0,0003042,SGSS	0,0001936,VDLS	0,0001936,SDGS
dd-random	dd-helix	0.0765754	0.00065393	1.068e-05	21688	0,00065393,GSSG	0,00037471,SSGS	0,0003042,SGSS	0,0001936,SDGS	0,0001936,PTLP
dd-random	dd-random	0	0	0	0	0,0,	0,0,	0,0,	0,0,	0,0,
dd-random	dd-sheet	0.104267	0.00064728	1.119e-05	19087	0,00064728,GSSG	0,00036514,SSGS	0,00022684,SSGL	0,00021595,SGSS	0,0001936,PTLP
dd-random	no-helix	0.14014	0.0003832	1.129e-05	20338	0,0003832,GSSG	0,0001922,SSGS	0,00018102,VDLS	0,00017473,PTLP	0,00016844,GLDL
dd-random	no-random	0.715637	0.0003872	2.766e-05	26175	0,0003872,SSGS	0,0003511,GSSG	0,0003042,SGSS	0,0002489,SSGL	0,0001936,SDGS
dd-random	no-sheet	0.0950013	0.0002968	1.436e-05	19846	0,0002968,GSSG	0,0001936,LAPG	0,00019115,SSGL	0,0001851,SSGS	0,000183976,PTLP
dd-random	all	0.131387	0.0006066	1.029e-05	21774	0,0006066,GSSG	0,00030483,SSGS	0,00024363,SGSS	0,00021014,SSGL	0,0001718,PATG
dd-random	random	0.447863	0.00016211	1.15e-05	23173	0,00016211,SSGL	0,00015786,LTEL	0,00015058,NVIG	0,00014765,VDLS	0,00014765,SDGS
dd-random	s-helix	0.480485	0.00067702	1.088e-05	24640	0,00067702,GSSG	0,00037282,SSGS	0,000301803,SGSS	0,000241708,SSGL	0,0001936,PTLP
dd-random	s-sheet	0.481745	0.0006914	1.121e-05	24089	0,0006914,GSSG	0,0003588,SSGS	0,00026161,SGSS	0,0002347,SSGL	0,0001936,SDGS
dd-random	krtm-helix	0.961253	0.0006914	1.02e-05	25299	0,0006914,GSSG	0,0003872,SSGS	0,0003042,SGSS	0,0002489,SSGL	0,0001936,VDLS
dd-random	tm-helix	0.494474	0.00067644	1.042e-05	23689	0,00067644,GSSG	0,00036725,SSGS	0,00028924,SGSS	0,00019403,SSGL	0,0001936,SDGS
dd-random	krtm-sheet	0.956156	0.0006914	2.766e-05	26325	0,0006914,GSSG	0,0003042,SGSS	0,0002489,SSGL	0,0001936,VDLS	0,0001936,SDGS
dd-random	tm-sheet	0.467533	0.00061942	1.099e-05	21310	0,00061942,GSSG	0,0002672,SSGS	0,00025621,SGSS	0,00022491,SSGL	0,0001936,SDGS
dd-sheet	dc-helix	0.0996618	0.0002427	1.023e-05	24223	0,0002427,PDGT	0,0002427,DGTV	0,0002427,DGSV	0,0002206,GDGS	0,00021737,GEVV
dd-sheet	dc-random	0.151778	0.0002442	2.206e-05	21330	0,0002442,GEVV	0,0002427,PDGT	0,0002001,GVTV	0,0002001,GSVV	0,0001986,VENG
dd-sheet	dc-sheet	0.14671	0.0002427	1.64e-05	24302	0,0002427,PDGT	0,0002427,DGTV	0,0002427,DGSV	0,0002206,GSVV	0,0002206,GDGS
dd-sheet	dd-helix	0.0582814	0.0002647	1.038e-05	18703	0,0002647,GEVV	0,0002427,DGSV	0,00023021,PDGT	0,00021772,DGTV	0,00020811,GSVV
dd-sheet	dd-random	0.104267	0.00021504	1.088e-05	23052	0,00021504,PDGT	0,00020939,GEVV	0,0001986,EGEV	0,00019294,GVTV	0,00018739,DGSV
dd-sheet	dd-sheet	0	0	0	0	0,0,	0,0,	0,0,	0,0,	0,0,
dd-sheet	no-helix	0.0964279	0.00018287	1.268e-05	19433	0,00018287,GDGS	0,00017658,GVTV	0,00017344,VENG	0,00016095,PDGT	0,00015763,LDGG
dd-sheet	no-random	0.634036	0.0002647	2.206e-05	29377	0,0002647,GEVV	0,0002427,PDGT	0,0002427,DGTV	0,0002427,DGSV	0,0002206,GSVV
dd-sheet	no-sheet	0.078204	0.000233076	1.125e-05	23008	0,000233076,PDGT	0,000233076,DGTV	0,0002262,GEVV	0,00022345,DGSV	0,000210976,GVTV
dd-sheet	all	0.0973172	0.0002114	1.02e-05	20617	0,0002114,GEVV	0,00020636,PDGT	0,00019909,DGTV	0,00019425,DGSV	0,00017215,GSVV
dd-sheet	random	0.421475	0.00024428	1.003e-05	25407	0,00024428,GEVV	0,00022228,PDGT	0,00021717,DGSV	0,000215495,GVTV	0,00021039,GSVV
dd-sheet	s-helix	0.445035	0.00024792	1.007e-05	26388	0,00024792,GEVV	0,0002427,DGSV	0,000240303,PDGT	0,000235508,DGTV	0,000218203,GDGS
dd-sheet	s-sheet	0.391474	0.0002427	1.091e-05	18926	0,0002427,PDGT	0,0002206,GDGS	0,0002143,DGTV	0,0002143,DGSV	0,0001986,VENG
dd-sheet	krtm-helix	0.954558	0.0002427	2.08e-05	28156	0,0002427,PDGT	0,0002427,DGTV	0,0002427,DGSV	0,0002206,GSVV	0,0002206,GDGS
dd-sheet	tm-helix	0.412146	0.000254724	1.054e-05	24566	0,000254724,GEVV	0,0002427,PDGT	0,0002427,DGSV	0,000237712,DGTV	0,0002206,GDGS
dd-sheet	krtm-sheet	0.957967	0.0002647	2.206e-05	29642	0,0002647,GEVV	0,0002427,PDGT	0,0002427,DGTV	0,0002427,DGSV	0,0002206,GSVV
dd-sheet	tm-sheet	0.34187	0.0002647	1.04e-05	24155	0,0002647,GEVV	0,0002427,PDGT	0,0002206,GDGS	0,0001986,VENG	0,0001986,VDGE
no-helix	dc-helix	0.0651555	0.0002727	1.001e-05	22277	0,0002727,GSSG	0,000195,SGSS	0,00017133,SSGS	0,0001509,PDGS	0,0001509,DGSV
no-helix	dc-random	0.0818563	0.0001258	1.094e-05	22410	0,0001258,LATG	0,0001179,GAVV	0,0001132,DILV	0,00010989,PDGS	0,0001069,VTLT
no-helix	dc-sheet	0.188114	0.0003082	1.117e-05	29196	0,0003082,GSSG	0,000195,SSGS	0,000195,SGSS	0,0001509,DGSV	0,0001384,DGTL
no-helix	dd-helix	0.0874658	0.00027073	1.258e-05	20992	0,00027073,GSSG	0,000195,SGSS	0,00018251,SSGS	0,0001509,DGSV	0,00013841,PDGS
no-helix	dd-random	0.14014	0.0001195	1.007e-05	24211	0,0001195,TLTL	0,0001132,GTLL	0,00011074,DGTL	0,0001069,LVVG	0,0001069,LVTG
no-helix	dd-sheet	0.0964279	0.00026408	1.235e-05	21816	0,00026408,GSSG	0,00017294,SSGS	0,0001195,TLTL	0,00010675,SGSS	0,0001006,VEVV
no-helix	no-helix	0	0	0	0	0,0,	0,0,	0,0,	0,0,	0,0,
no-helix	no-random	0.744892	0.000195	1.258e-05	35512	0,000195,SSGS	0,000195,SGSS	0,0001509,PDGS	0,0001509,DGSV	0,0001384,GAVV
no-helix	no-sheet	0.0401858	0.00013165	1.104e-05	17768	0,00013165,DGSV	0,00012203,PDGS	0,00011915,GAVV	0,00011915,DGTL	0,000109876,TLTL
no-helix	all	0.0138101	0.0002234	1.006e-05	13995	0,0002234,GSSG	0,00013443,SGSS	0,00011263,SSGS	0,00011214,PDGS	0,00010254,SPDG
no-helix	random	0.225898	0.00012537	1.065e-05	18383	0,00012537,DGSV	0,0001132,DILV	0,00011048,LATG	0,00010929,TLTL	0,00010538,AGTV
no-helix	s-helix	0.265748	0.00029382	1.0183e-05	25154	0,00029382,GSSG	0,000192603,SGSS	0,00018062,SSGS	0,0001509,DGSV	0,000148503,PDGS
no-helix	s-sheet	0.209687	0.0003082	1.076e-05	23897	0,0003082,GSSG	0,0001666,SSGS	0,00015241,SGSS	0,0001509,PDGS	0,0001384,DGTL
no-helix	krtm-helix	0.968203	0.0003082	1.258e-05	33947	0,0003082,GSSG	0,000195,SSGS	0,000195,SGSS	0,0001509,PDGS	0,0001509,DGSV
no-helix	tm-helix	0.365983	0.00029324	1.02e-05	23692	0,00029324,GSSG	0,00018004,SGSS	0,00017505,SSGS	0,0001509,DGSV	0,000140924,PDGS
no-helix	krtm-sheet	0.974555	0.0003082	1.258e-05	35793	0,0003082,GSSG	0,000195,SGSS	0,0001509,PDGS	0,0001509,DGSV	0,0001384,GAVV
no-helix	tm-sheet	0.233387	0.00023622	1.092e-05	27009	0,00023622,GSSG	0,0001509,PDGS	0,00014701,SGSS	0,0001258,LPDG	0,0001195,VAPG
no-random	dc-helix	0.686117	0.0016655	2.08e-05	2798	0,0016655,VVGI	0,001021,ESEV	0,00100917,VGIV	0,00100917,IVVD	0,00100917,GIVT
no-random	dc-random	0.763027	0.00165999	0.0001968	2801	0,00165999,VVGI	0,001021,QELD	0,001021,LGGA	0,0010005,VGIV	0,0010005,SPEA
no-random	dc-sheet	0.670822	0.00164299	5.02e-05	2801	0,00164299,VVGI	0,001021,TLSD	0,001021,SPEA	0,001021,SLGG	0,001021,QELD
no-random	dd-helix	0.648862	0.00167602	1.55e-05	2801	0,00167602,VVGI	0,00100851,VGIV	0,00100851,GIVT	0,00099602,QELD	0,00099602,IVVD
no-random	dd-random	0.715637	0.0015904	0.0001467	2801	0,0015904,VVGI	0,001021,SPEA	0,001021,QELD	0,001021,ESEV	0,00099334,VGIV
no-random	dd-sheet	0.634036	0.00163481	0.0001197	2802	0,00163481,VVGI	0,001021,SPEA	0,00099894,ESEV	0,00097688,VGIV	0,00097688,QELD
no-random	no-helix	0.744892	0.00168213	3.21e-05	2802	0,00168213,VVGI	0,001014711,QELD	0,00100842,SPEA	0,00100213,TLSD	0,00100213,GIVT
no-random	no-random	0	0	0	0	0,0,	0,0,	0,0,	0,0,	0,0,
no-random	no-sheet	0.708739	0.00167213	3.23e-05	2801	0,00167213,VVGI	0,001021,IVVD	0,001011376,QELD	0,001011376,GIVT	0,001011376,ESEV
no-random	all	0.755183	0.00166224	0.0001756	2802	0,00166224,VVGI	0,0009992,VGIV	0,0009992,GIVT	0,00099435,SPEA	0,00099435,QELD
no-random	random	0.878004	0.00168058	0.0002025	2801	0,00168058,VVGI	0,001021,QELD	0,001015895,IVVD	0,00101079,VGIV	0,00100568,TLSD
no-random	s-helix	0.865706	0.00169141	1.19e-05	2801	0,001691411,VVGI	0,001016205,GIVT	0,001013808,VGIV	0,00100901,IVVD	0,00100662,SLGG
no-random	s-sheet	0.85839	0.00161581	0.0001415	2802	0,00161581,VVGI	0,001021,SPEA	0,001021,QELD	0,0010068,TLSD	0,0010068,SLGG
no-random	krtm-helix	0.959689	0.001701	2.89e-05	2780	0,001701,VVGI	0,001021,VGIV	0,001021,SPEA	0,001021,QELD	0,001021,LGGA
no-random	tm-helix	0.821591	0.0015763	3.6e-05	2799	0,0015763,VVGI	0,001021,SPEA	0,001021,QELD	0,001016012,IVVD	0,001011024,ESEV
no-random	krtm-sheet	0.96392	0.001701	0.0002799	2685	0,001701,VVGI	0,001021,VGIV	0,001021,TLSD	0,001021,SPEA	0,001021,SLGG
no-random	tm-sheet	0.851519	0.001701	2.84e-05	2800	0,001701,VVGI	0,001021,VGIV	0,001021,SPEA	0,001021,QELD	0,001021,IVVD
no-sheet	dc-helix	0.0499723	0.0003591	1.042e-05	13771	0,0003591,GSSG	0,0002214,SGSS	0,00018067,ELGL	0,00017843,SSGS	0,0001377,PEEL
no-sheet	dc-random	0.0371511	0.00026699	1.422e-05	14487	0,00026699,LEAL	0,00022849,ALAA	0,0001829,LELL	0,0001816,LAAA	0,00018039,EALA
no-sheet	dc-sheet	0.200599	0.0003946	1.87e-05	19414	0,0003946,GSSG	0,000308,LEAL	0,0002214,SGSS	0,00021149,ALAA	0,0002021,SSGS
no-sheet	dd-helix	0.0444604	0.00035713	1.065e-05	13098	0,00035713,GSSG	0,0002214,SGSS	0,00018961,SSGS	0,0001444,PEVL	0,0001155,DLPE
no-sheet	dd-random	0.0950013	0.000308	1.084e-05	16404	0,000308,LEAL	0,00024184,ALAA	0,0002214,EALA	0,0001829,LELL	0,00017444,LAAA
no-sheet	dd-sheet	0.078204	0.00035048	1.081e-05	15613	0,00035048,GSSG	0,00026388,LEAL	0,00022538,ALAA	0,0002021,AEAL	0,00018004,SSGS
no-sheet	no-helix	0.0401858	0.000301711	1.039e-05	14436	0,000301711,LEAL	0,00023177,ALAA	0,000215111,EALA	0,00017694,AEAL	0,00016734,AAAL
no-sheet	no-random	0.708739	0.0002214	1.925e-05	23151	0,0002214,SGSS	0,0002214,EALA	0,0002021,SSGS	0,0002021,AEAL	0,0001925,LAAL
no-sheet	no-sheet	0	0	0	0	0,0,	0,0,	0,0,	0,0,	0,0,
no-sheet	all	0.0333466	0.0003098	1.12e-05	13011	0,0003098,GSSG	0,0001941,LEAL	0,00016083,SGSS	0,0001459,ALAA	0,00013445,LELL
no-sheet	random	0.257173	0.00028758	1.004e-05	15744	0,00028758,LEAL	0,00025418,ALAA	0,00020098,EALA	0,00018168,LAAA	0,00018168,AEAL
no-sheet	s-helix	0.298407	0.00038022	1.02e-05	17060	0,00038022,GSSG	0,000219003,SGSS	0,00018772,SSGS	0,00018051,ELGL	0,000139605,LGLP
no-sheet	s-sheet	0.255034	0.0003946	1.01e-05	18145	0,0003946,GSSG	0,0002796,LEAL	0,0002411,ALAA	0,0002021,AEAL	0,000193,EALA
no-sheet	krtm-helix	0.965543	0.0003946	1.925e-05	22230	0,0003946,GSSG	0,000308,LEAL	0,0002214,SGSS	0,0002214,EALA	0,0002021,SSGS
no-sheet	tm-helix	0.381855	0.00037964	1.216e-05	18396	0,00037964,GSSG	0,00027309,LEAL	0,00020644,SGSS	0,00020644,EALA	0,00018714,AEAL
no-sheet	krtm-sheet	0.976149	0.0003946	1.925e-05	23459	0,0003946,GSSG	0,000308,LEAL	0,0002695,ALAA	0,0002214,SGSS	0,0002214,EALA
no-sheet	tm-sheet	0.282006	0.00032262	1.451e-05	17973	0,00032262,GSSG	0,000308,LEAL	0,0002214,EALA	0,0002021,AEAL	0,00019752,ALAA
all	dc-helix	0.0725499	0.0001381	1.025e-05	15180	0,0001381,IGGG	0,00012147,LGAD	0,00010713,VGAG	0,00010687,LGGG	9,933e-05,GGGL
all	dc-random	0.0782618	0.00012369	1.1e-05	16733	0,00012369,AALA	0,0001176,IGGG	0,0001152,LAAA	0,0001139,DVVI	0,0001103,VGAG
all	dc-sheet	0.231088	0.0001381	1.211e-05	23429	0,0001381,IGGG	0,0001236,LLAA	0,0001139,LEAL	0,0001139,AAGL	0,0001114,ALGA
all	dd-helix	0.0746889	0.0001381	1.023e-05	13609	0,0001381,IGGG	0,0001187,LGGG	0,00011831,VGAG	9,933e-05,GGGL	9,691e-05,GSGS
all	dd-random	0.131387	0.00013704	1.01e-05	18576	0,00013704,AALA	0,0001284,ADVV	0,0001236,LLAA	0,0001236,LAGL	0,0001236,ALAL
all	dd-sheet	0.0973172	0.0001551	1.108e-05	16813	0,0001551,AAAA	0,00014264,AALA	0,00011844,VAAA	0,00011364,LAAA	0,0001114,AEAL
all	no-helix	0.0138101	0.00012697	1.02e-05	10589	0,00012697,AALA	0,00011102,ALAL	0,000107611,LEAL	0,00010666,IGGG	0,00010479,AAAA
all	no-random	0.755183	0.0001551	1.211e-05	29197	0,0001551,AAAA	0,0001405,VAAA	0,0001381,IGGG	0,0001333,LGAD	0,0001308,LAAL
all	no-sheet	0.0333466	0.0001381	1.003e-05	11579	0,0001381,IGGG	0,0001139,DVVI	0,000109076,LGGG	0,0001042,GVPV	0,00010193,VGAG
all	all	0	0	0	0	0,0,	0,0,	0,0,	0,0,	0,0,
all	random	0.174684	0.00014938	1.004e-05	14587	0,00014938,AALA	0,00011528,LAAA	0,0001139,DVVI	0,00011089,LALA	0,00010828,LLAA
all	s-helix	0.201671	0.0001381	1.002e-05	15485	0,0001381,IGGG	0,0001308,VGAG	0,000123711,LGAD	0,0001187,LGGG	0,0001018,GLGG
all	s-sheet	0.193538	0.0001381	1.003e-05	19048	0,0001381,IGGG	0,0001363,AALA	0,0001114,AEAL	0,0001094,LLAA	0,0001073,LAAA
all	krtm-helix	0.958256	0.0001333	1.211e-05	27698	0,0001333,LGAD	0,0001284,ADVV	0,0001139,LEAL	0,0001139,DVVI	0,0001114,AEAL
all	tm-helix	0.273871	0.000128312	1.012e-05	18266	0,000128312,LGAD	0,00011344,ADVV	0,000108912,DVVI	0,0001042,EEAL	0,000104012,AEAA
all	krtm-sheet	0.973301	0.0001647	1.211e-05	29528	0,0001647,AALA	0,0001551,AAAA	0,0001381,IGGG	0,0001308,VGAG	0,0001308,LAAL
all	tm-sheet	0.251448	0.0001284	1.016e-05	21163	0,0001284,ADVV	0,00011671,AALA	0,0001163,ALLA	0,0001139,LEAL	0,0001139,DVVI
random	dc-helix	0.273051	0.0012155	1.021e-05	32475	0,0012155,GSSG	0,00071663,SSGS	0,0006586,SGSS	0,000536,SGPS	0,0005156,GPSS
random	dc-random	0.276566	0.00047459	1.004e-05	25736	0,00047459,GPSS	0,00047449,SGPS	8,679e-05,GKGS	8,168e-05,GGKG	7,658e-05,VPRG
random	dc-sheet	0.529357	0.001251	1.021e-05	40440	0,001251,GSSG	0,0007403,SSGS	0,0006586,SGSS	0,000536,SGPS	0,0005156,GPSS
random	dd-helix	0.363975	0.00121353	1.021e-05	30613	0,00121353,GSSG	0,00072781,SSGS	0,0006586,SGSS	0,000536,SGPS	0,0005156,GPSS
random	dd-random	0.447863	0.0005596	1.021e-05	31310	0,0005596,GSSG	0,00048069,SGPS	0,00046029,GPSS	0,0003544,SGSS	0,0003531,SSGS
random	dd-sheet	0.421475	0.00120688	1.021e-05	33722	0,00120688,GSSG	0,00071824,SSGS	0,00057035,SGSS	0,0005156,GPSS	0,00049188,SGPS
random	no-helix	0.225898	0.0009428	1.021e-05	23128	0,0009428,GSSG	0,0005453,SSGS	0,00050456,SGPS	0,00048416,GPSS	0,0004636,SGSS
random	no-random	0.878004	0.0009107	1.021e-05	45002	0,0009107,GSSG	0,0007403,SSGS	0,0006586,SGSS	0,000536,SGPS	0,0005156,GPSS
random	no-sheet	0.257173	0.0008564	1.021e-05	26040	0,0008564,GSSG	0,0005382,SSGS	0,00051675,SGPS	0,00049635,GPSS	0,0004372,SGSS
random	all	0.174684	0.0011662	1.013e-05	21294	0,0011662,GSSG	0,00065793,SSGS	0,00059803,SGSS	0,00052146,SGPS	0,0004938,GPSS
random	random	0	0	0	0	0,0,	0,0,	0,0,	0,0,	0,0,
random	s-helix	0.0385313	0.00123662	1.021e-05	24683	0,00123662,GSSG	0,00072592,SSGS	0,000656203,SGSS	0,000533603,SGPS	0,0005156,GPSS
random	s-sheet	0.166956	0.001251	1.021e-05	32064	0,001251,GSSG	0,0007119,SSGS	0,00061601,SGSS	0,000536,SGPS	0,0005014,GPSS
random	krtm-helix	0.992468	0.001251	1.021e-05	44030	0,001251,GSSG	0,0007403,SSGS	0,0006586,SGSS	0,000536,SGPS	0,0005156,GPSS
random	tm-helix	0.596422	0.00123604	1.021e-05	33442	0,00123604,GSSG	0,00072035,SSGS	0,00064364,SGSS	0,000536,SGPS	0,0005156,GPSS
random	krtm-sheet	0.990575	0.001251	1.021e-05	45073	0,001251,GSSG	0,0006586,SGSS	0,000536,SGPS	0,0005156,GPSS	0,0003727,HHHH
random	tm-sheet	0.311865	0.00117902	1.021e-05	34095	0,00117902,GSSG	0,0006203,SSGS	0,00061061,SGSS	0,000536,SGPS	0,0005156,GPSS
s-helix	dc-helix	0.30363	0.0002301	1.005e-05	11740	0,0002301,LKAL	0,0002134,EALR	0,000211,LKEL	0,0002086,EALK	0,0001942,ARAL
s-helix	dc-random	0.324693	0.00028979	1.041e-05	19847	0,00028979,AALA	0,00028739,ALAA	0,0002672,LAAA	0,0002432,ALLA	0,0002301,LKAL
s-helix	dc-sheet	0.567534	0.00027039	1.11e-05	21562	0,00027039,ALAA	0,0002541,LEAL	0,0002397,AEAL	0,0002325,LEEL	0,0002301,LKAL
s-helix	dd-helix	0.395111	0.0002301	1.038e-05	13683	0,0002301,LKAL	0,0002134,EALR	0,000211,LKEL	0,0002086,EALK	0,0001942,ARAL
s-helix	dd-random	0.480485	0.00030314	1.07e-05	20552	0,00030314,AALA	0,00030074,ALAA	0,00026004,LAAA	0,0002541,LEAL	0,0002421,EALA
s-helix	dd-sheet	0.445035	0.00030874	1.004e-05	18893	0,00030874,AALA	0,00028428,ALAA	0,00026564,LAAA	0,00024164,ALLA	0,0002397,AEAL
s-helix	no-helix	0.265748	0.00029307	1.022e-05	16990	0,00029307,AALA	0,00029067,ALAA	0,000247811,LEAL	0,00024368,LAAA	0,00024003,ALAE
s-helix	no-random	0.865706	0.0002613	1.199e-05	24561	0,0002613,AAAL	0,0002589,ALAE	0,0002421,EALA	0,0002397,LAAL	0,0002397,AEAL
s-helix	no-sheet	0.298407	0.0002301	1.15e-05	14541	0,0002301,LKAL	0,0002134,EALR	0,000211,LKEL	0,0002086,EALK	0,0001942,ARAL
s-helix	all	0.201671	0.0002301	1.109e-05	13613	0,0002301,LKAL	0,0002134,EALR	0,000211,LKEL	0,0002086,EALK	0,0002048,ALAA
s-helix	random	0.0385313	0.00031548	1.012e-05	15937	0,00031548,AALA	0,00031308,ALAA	0,00026728,LAAA	0,00025349,ALLA	0,00023368,LEAL
s-helix	s-helix	0	0	0	0	0,0,	0,0,	0,0,	0,0,	0,0,
s-helix	s-sheet	0.0666802	0.0003024	1.015e-05	15466	0,0003024,AALA	0,0003,ALAA	0,0002593,LAAA	0,0002397,AEAL	0,0002353,ALLA
s-helix	krtm-helix	0.986397	0.0002541	1.199e-05	23874	0,0002541,LEAL	0,0002421,EALA	0,0002397,AEAL	0,0002325,LEEL	0,0002301,LKAL
s-helix	tm-helix	0.421116	0.00022897	1.005e-05	16389	0,00022897,ALAE	0,00022714,EALA	0,00022474,AEAL	0,00021919,LEAL	0,00021255,LEEL
s-helix	krtm-sheet	0.99206	0.0003308	1.199e-05	25202	0,0003308,AALA	0,0003284,ALAA	0,0002637,ALLA	0,0002613,AAAL	0,0002589,ALAE
s-helix	tm-sheet	0.29407	0.00028281	1.193e-05	19334	0,00028281,AALA	0,0002637,ALLA	0,0002589,ALAE	0,00025642,ALAA	0,0002541,LEAL
s-sheet	dc-helix	0.224017	0.00018697	1.182e-05	30801	0,00018697,TVLV	0,00017987,AVVV	0,0001704,VVSV	0,0001704,VKVI	0,0001704,VGRV
s-sheet	dc-random	0.287011	0.0002272	1.42e-05	34015	0,0002272,AVVV	0,000213,VVVE	0,0001988,TVLV	0,0001704,VKVI	0,0001704,VGRV
s-sheet	dc-sheet	0.435073	0.0001704	1.18e-05	33476	0,0001704,VLEG	0,0001704,VKVI	0,0001704,VGRV	0,0001562,VVLR	0,000142,VVKV
s-sheet	dd-helix	0.367078	0.00020222	1.025e-05	31261	0,00020222,AVVV	0,00018631,TVLV	0,0001704,VKVI	0,0001704,VGRV	0,00016304,VVVE
s-sheet	dd-random	0.481745	0.0002272	1.42e-05	35440	0,0002272,AVVV	0,000213,VVVE	0,00017114,TVLV	0,0001704,VVSV	0,0001704,VKVI
s-sheet	dd-sheet	0.391474	0.0001704	1.114e-05	29192	0,0001704,VKVI	0,0001704,VGRV	0,0001562,VVLR	0,000142,VVKV	0,000142,VKVY
s-sheet	no-helix	0.209687	0.0001706	1.115e-05	25401	0,0001706,AVVV	0,0001704,VKVI	0,0001704,VGRV	0,0001562,VVLR	0,00014524,KVTV
s-sheet	no-random	0.85839	0.0002272	1.42e-05	42365	0,0002272,AVVV	0,000213,VVVE	0,0001704,VVSV	0,0001704,VLEG	0,0001704,VKVI
s-sheet	no-sheet	0.255034	0.000213	1.277e-05	29582	0,000213,VVVE	0,00020795,AVVV	0,0001988,TVLV	0,0001704,VKVI	0,0001704,VGRV
s-sheet	all	0.193538	0.0001704	1.008e-05	25648	0,0001704,VKVI	0,0001704,VGRV	0,00016697,VVVE	0,0001562,VVLR	0,00015519,TVLV
s-sheet	random	0.166956	0.0002272	1.084e-05	25548	0,0002272,AVVV	0,000213,VVVE	0,0001988,TVLV	0,000179495,AVLL	0,0001704,DVVI
s-sheet	s-helix	0.0666802	0.00020802	1.069e-05	25503	0,00020802,AVVV	0,00019382,VVVE	0,00018681,TVLV	0,000165605,KVTV	0,000163208,VKVI
s-sheet	s-sheet	0	0	0	0	0,0,	0,0,	0,0,	0,0,	0,0,
s-sheet	krtm-helix	0.98746	0.0001988	1.42e-05	40948	0,0001988,TVLV	0,0001704,VVSV	0,0001704,VLEG	0,0001704,VKVI	0,0001704,VGRV
s-sheet	tm-helix	0.549015	0.00018806	1.037e-05	26426	0,00018806,VVVE	0,0001704,EVVE	0,000165412,VKVI	0,000165412,EVEV	0,000165412,DVVI
s-sheet	krtm-sheet	0.988082	0.0002272	1.42e-05	42788	0,0002272,AVVV	0,000213,VVVE	0,0001988,TVLV	0,0001846,AVLL	0,0001704,VVSV
s-sheet	tm-sheet	0.247584	0.00020321	1.321e-05	33510	0,00020321,AVVV	0,00018901,VVVE	0,00017481,TVLV	0,0001704,VLEG	0,0001704,VGRV
krtm-helix	dc-helix	0.966135	0.0010922	1.37e-05	5529	0,0010922,LGLL	0,0008986,VLLV	0,00088677,LLVG	0,00088677,GVLL	0,00085127,GIAL
krtm-helix	dc-random	0.981826	0.0011435	1.22e-05	5563	0,0011435,LGLL	0,0010695,LAAA	0,0009341,VLLV	0,0009136,LLVG	0,0009136,GVLL
krtm-helix	dc-sheet	0.96905	0.00118799	2.13e-05	5493	0,00118799,LGLL	0,00103199,LAAA	0,00087609,LLVG	0,00087609,GIAL	0,0007785,GLAL
krtm-helix	dd-helix	0.948643	0.00115857	1.83e-05	5544	0,00115857,LGLL	0,00090912,VLLV	0,00089663,LLVG	0,00089663,GIAL	0,00088414,GVLL
krtm-helix	dd-random	0.961253	0.00116303	1.74e-05	5561	0,00116303,LGLL	0,00106234,LAAA	0,0009341,VLLV	0,0009341,VALA	0,0009341,GVLL
krtm-helix	dd-sheet	0.954558	0.001246	2.33e-05	5549	0,001246,LGLL	0,00106794,LAAA	0,00088998,VALA	0,00088998,LLVG	0,00084585,GIAL
krtm-helix	no-helix	0.968203	0.00120827	2.99e-05	5564	0,00120827,LGLL	0,00104598,LAAA	0,00089637,GVLL	0,00089008,VALA	0,00088379,GIAL
krtm-helix	no-random	0.959689	0.001246	0.0001268	5228	0,001246,LGLL	0,0009341,VLLV	0,0009341,LLVG	0,0009341,GIAL	0,0007785,LLAL
krtm-helix	no-sheet	0.965543	0.0012075	1.13e-05	5561	0,0012075,LGLL	0,00091485,VLLV	0,0008956,LLVG	0,0008956,GIAL	0,0008879,LAAA
krtm-helix	all	0.958256	0.0011927	1.76e-05	5563	0,0011927,LGLL	0,0009543,LAAA	0,00089776,LLVG	0,00088565,GIAL	0,00087838,VLLV
krtm-helix	random	0.992468	0.00121537	5.87e-05	5564	0,00121537,LGLL	0,00106958,LAAA	0,0009341,VLLV	0,00092389,VALA	0,00092389,LLVG
krtm-helix	s-helix	0.986397	0.00117408	1.19e-05	5555	0,00117408,LGLL	0,00091492,VLLV	0,00090293,LLVG	0,00089335,GIAL	0,00089095,GVLL
krtm-helix	s-sheet	0.98746	0.0012318	1.37e-05	5556	0,0012318,LGLL	0,0010616,LAAA	0,00087731,GIAL	0,00086311,VALA	0,00084891,VLLV
krtm-helix	krtm-helix	0	0	0	0	0,0,	0,0,	0,0,	0,0,	0,0,
krtm-helix	tm-helix	0.885995	0.0009168	1.11e-05	5361	0,0009168,LGLL	0,0008655,LAAA	0,0007296,GIAL	0,0007096,VALA	0,0007047,GVLL
krtm-helix	krtm-sheet	0.988648	0.001246	6.65e-05	5316	0,001246,LGLL	0,0009341,VLLV	0,0009341,VALA	0,0009341,LLVG	0,0009341,GIAL
krtm-helix	tm-sheet	0.985074	0.00122201	1.17e-05	5491	0,00122201,LGLL	0,00097,LAAA	0,0009341,VLLV	0,0009341,GVLL	0,00088611,VALA
tm-helix	dc-helix	0.373979	0.00038033	1.004e-05	13807	0,00038033,LILL	0,00035167,LLLV	0,0003374,LLLL	0,00032993,ILLL	0,00032177,LLVL
tm-helix	dc-random	0.57887	0.0004439	1.22e-05	15212	0,0004439,LLLL	0,000404,LILL	0,000399,LLLV	0,0003891,ILLL	0,0003691,LLVL
tm-helix	dc-sheet	0.565841	0.0004439	1.06e-05	15678	0,0004439,LLLL	0,000404,LILL	0,00033109,ILLL	0,0003292,LLAA	0,00032109,LALA
tm-helix	dd-helix	0.352653	0.00036653	1.22e-05	13746	0,00036653,LILL	0,00036153,LLLV	0,00032665,ILLL	0,00030665,LLVL	0,00030665,LLAL
tm-helix	dd-random	0.494474	0.00041624	1.18e-05	15337	0,00041624,LLLL	0,000404,LILL	0,0003791,LAVL	0,0003791,LALA	0,00036144,ILLL
tm-helix	dd-sheet	0.412146	0.000404	1.075e-05	14205	0,000404,LILL	0,0003891,ILLL	0,00035704,LALA	0,00035488,LLLV	0,00034704,LLAL
tm-helix	no-helix	0.365983	0.0003873	1.063e-05	13043	0,0003873,LLLL	0,00037652,ILLL	0,00036627,LILL	0,00035394,LALA	0,00035023,LLVL
tm-helix	no-random	0.821591	0.0004439	1.496e-05	18447	0,0004439,LLLL	0,000404,LILL	0,000399,LLLV	0,0003891,ILLL	0,0003791,LAVL
tm-helix	no-sheet	0.381855	0.00038475	1.0326e-05	14345	0,00038475,LILL	0,000379476,ILLL	0,00037653,LLLL	0,0003605,LLLV	0,0003406,LAVL
tm-helix	all	0.273871	0.00039545	1.0115e-05	13485	0,00039545,LLLL	0,00037008,LILL	0,00036993,LLLV	0,0003673,ILLL	0,00033065,LAVL
tm-helix	random	0.596422	0.000438795	1.344e-05	13958	0,000438795,LLLL	0,000404,LILL	0,00038879,LLLV	0,000383995,ILLL	0,00036889,LAVL
tm-helix	s-helix	0.421116	0.00038242	1.0165e-05	14386	0,00038242,LILL	0,00037982,LLLV	0,00036752,ILLL	0,0003528,LLLL	0,00033074,LLVL
tm-helix	s-sheet	0.549015	0.00040131	1.031e-05	13254	0,00040131,LLLL	0,0003756,LILL	0,00034651,ILLL	0,00034221,LLLV	0,000325,ALLL
tm-helix	krtm-helix	0.885995	0.0002843	1.39e-05	15961	0,0002843,GLLL	0,0002693,AVVL	0,0002594,VLAL	0,0002544,LVLA	0,0002544,LLII
tm-helix	tm-helix	0	0	0	0	0,0,	0,0,	0,0,	0,0,	0,0,
tm-helix	krtm-sheet	0.983116	0.0004439	1.496e-05	18705	0,0004439,LLLL	0,000404,LILL	0,000399,LLLV	0,0003891,ILLL	0,0003791,LAVL
tm-helix	tm-sheet	0.619649	0.00041991	1.06e-05	14872	0,00041991,LLLL	0,000404,LILL	0,000399,LLLV	0,0003891,ILLL	0,0003791,LAVL
krtm-sheet	dc-helix	0.984982	0.001202	0.0001284	2381	0,001202,VGLS	0,001202,SIVG	0,001202,GVSY	0,001202,GVGY	0,001202,GLGA
krtm-sheet	dc-random	0.977473	0.0011815	0.0002161	2381	0,0011815,GLGA	0,00116099,VGLS	0,00116099,TAGV	0,00116099,GVSY	0,00114049,SVDV
krtm-sheet	dc-sheet	0.977265	0.001202	0.0001105	2382	0,001202,SVDV	0,001202,SIGA	0,001202,LGTE	0,001202,GLGA	0,00114399,VGLS
krtm-sheet	dd-helix	0.968914	0.001202	0.0001258	2382	0,001202,SVDV	0,001202,SIGA	0,001202,GVGY	0,00118951,LGTE	0,00117702,GVSY
krtm-sheet	dd-random	0.956156	0.001202	1.34e-05	2382	0,001202,SIVG	0,001202,SIGA	0,001202,LGTE	0,001202,GVSY	0,001202,GVGY
krtm-sheet	dd-sheet	0.957967	0.001202	0.00018	2382	0,001202,TAGV	0,001202,SIGA	0,00117994,VGLS	0,00117994,SVDV	0,00117994,GVGY
krtm-sheet	no-helix	0.974555	0.00119571	0.0002056	2382	0,001195711,SIVG	0,001195711,SIGA	0,001195711,GVSY	0,001195711,GVGY	0,00118313,LGTE
krtm-sheet	no-random	0.96392	0.001202	6.03e-05	2377	0,001202,TAGV	0,001202,SVDV	0,001202,SIVG	0,001202,SIGA	0,001202,LGTE
krtm-sheet	no-sheet	0.976149	0.00119238	0.0001985	2382	0,001192376,SIVG	0,001192376,GVGY	0,00118275,VGLS	0,00118275,SIGA	0,00117313,TAGV
krtm-sheet	all	0.973301	0.00118746	0.0002601	2382	0,00118746,GVGY	0,00118262,SIGA	0,0011802,GVSY	0,00117777,LGTE	0,00116808,SVDV
krtm-sheet	random	0.990575	0.0011969	0.0003036	2381	0,001196895,GVSY	0,00118668,GVGY	0,00118158,VGLS	0,00118158,SIGA	0,00117647,TAGV
krtm-sheet	s-helix	0.99206	0.001202	0.0001129	2382	0,001202,GVSY	0,001202,GVGY	0,001197205,LGTE	0,001192411,SVDV	0,001192411,SIVG
krtm-sheet	s-sheet	0.988082	0.0011878	0.0002444	2382	0,0011878,TAGV	0,0011878,SIGA	0,0011878,LGTE	0,0011736,SVDV	0,0011736,GVSY
krtm-sheet	krtm-helix	0.988648	0.001202	8.92e-05	2369	0,001202,VGLS	0,001202,TAGV	0,001202,SVDV	0,001202,SIVG	0,001202,SIGA
krtm-sheet	tm-helix	0.983116	0.00119701	4.15e-05	2382	0,001197012,SVDV	0,001192024,LGTE	0,00118704,GVSY	0,00117207,GVGY	0,0011621,TAGV
krtm-sheet	krtm-sheet	0	0	0	0	0,0,	0,0,	0,0,	0,0,	0,0,
krtm-sheet	tm-sheet	0.977487	0.00115401	6.47e-05	2381	0,00115401,SVDV	0,00113002,SIVG	0,00110602,LGTE	0,001034,SIGA	0,000986,VGLS
tm-sheet	dc-helix	0.293601	0.0004559	1.216e-05	22649	0,0004559,SGPL	0,0004079,LYGG	0,00039607,SLNL	0,0003599,PTLS	0,0003599,LGLG
tm-sheet	dc-random	0.319821	0.0004079	1.047e-05	20390	0,0004079,SLNL	0,0004079,LYGG	0,00037388,SGPL	0,0003599,ASYG	0,0003359,QPLF
tm-sheet	dc-sheet	0.415364	0.0004559	1.397e-05	22920	0,0004559,SGPL	0,0004079,SLNL	0,0004079,LYGG	0,0003839,PTLD	0,0003599,PTLS
tm-sheet	dd-helix	0.369205	0.00043092	1.052e-05	22612	0,00043092,SGPL	0,00038292,LYGG	0,00037043,SLNL	0,00037043,LSAS	0,0003599,ASYG
tm-sheet	dd-random	0.467533	0.00042824	1.301e-05	21597	0,00042824,SGPL	0,0004079,LSAS	0,0003839,PTLD	0,00038024,SLNL	0,00038024,LYGG
tm-sheet	dd-sheet	0.34187	0.00043384	1.16e-05	20161	0,00043384,SGPL	0,0004079,SLNL	0,0004079,LYGG	0,0003839,PTLD	0,0003599,PTLS
tm-sheet	no-helix	0.233387	0.000449611	1.026e-05	21822	0,000449611,SGPL	0,00037646,LYGG	0,00037017,SLNL	0,00036503,PTLD	0,00036388,LSAS
tm-sheet	no-random	0.851519	0.0004559	2.399e-05	25861	0,0004559,SGPL	0,0004079,SLNL	0,0004079,LYGG	0,0003839,PTLD	0,0003599,PTLS
tm-sheet	no-sheet	0.282006	0.00039815	1.41e-05	21317	0,00039815,SGPL	0,00038865,LYGG	0,0003694,LSAS	0,0003599,ASYG	0,0003454,PTLD
tm-sheet	all	0.251448	0.0004244	1.141e-05	20891	0,0004244,SGPL	0,00038125,LYGG	0,00037883,LSAS	0,00037156,SLNL	0,00036936,PTLD
tm-sheet	random	0.311865	0.00042016	1.072e-05	21527	0,00042016,SGPL	0,00039258,LYGG	0,00038748,LSAS	0,00038237,SLNL	0,0003599,ASYG
tm-sheet	s-helix	0.29407	0.000453503	1.2e-05	22365	0,000453503,SGPL	0,000403105,LYGG	0,00039591,SLNL	0,00038393,LSAS	0,000374311,PTLD
tm-sheet	s-sheet	0.247584	0.0004559	1.079e-05	18653	0,0004559,SGPL	0,0003937,LYGG	0,0003839,PTLD	0,0003795,SLNL	0,00036531,LSAS
tm-sheet	krtm-helix	0.985074	0.0004559	1.23e-05	24916	0,0004559,SGPL	0,0004079,SLNL	0,0004079,LYGG	0,0004079,LSAS	0,0003839,PTLD
tm-sheet	tm-helix	0.619649	0.000445924	1.119e-05	22322	0,000445924,SGPL	0,000402912,LYGG	0,00038795,SLNL	0,000378912,PTLD	0,0003599,PTLS
tm-sheet	krtm-sheet	0.977487	0.0004559	2.399e-05	25248	0,0004559,SGPL	0,0004079,SLNL	0,0004079,LYGG	0,0003599,PTLS	0,0003599,ASYG
tm-sheet	tm-sheet	0	0	0	0	0,0,	0,0,	0,0,	0,0,	0,0,

## Sheet: p_values
structure pool	Amino Acid Pattern	uncorrected p-value	adjusted p-value
s-helix	EELF	8.72338e-06	0.0236715
s-helix	EELL	2.66083e-09	0.000115525
s-helix	LEQL	1.97546e-05	0.0428844
s-helix	LEGE	2.57417e-05	0.0465678
s-helix	LAQA	6.89327e-07	0.00997617
s-helix	ALAD	2.96649e-08	0.000643981
s-helix	ALAE	2.20957e-05	0.0452612
s-helix	LLEN	8.71544e-06	0.0236715
s-helix	VEEL	5.37329e-06	0.017257
s-helix	ELAQ	2.04635e-06	0.0126782
s-helix	LTEE	2.92011e-06	0.0126782
s-helix	ALLN	1.78756e-05	0.0408477
s-helix	ELLI	2.93569e-05	0.0490226
s-helix	ELLA	9.86728e-06	0.0252004
s-helix	ELLT	2.4177e-05	0.0456388
s-helix	LEEE	2.49227e-06	0.0126782
s-helix	VLAQ	2.74202e-06	0.0126782
s-helix	TLAE	1.61252e-05	0.0388948
s-helix	LEEL	1.10991e-06	0.0101097
s-helix	LTDE	1.16425e-06	0.0101097
s-helix	EGFL	5.56459e-06	0.017257
s-helix	LTLE	2.74202e-06	0.0126782
s-helix	IAEN	2.29345e-05	0.0452612
s-helix	EQAI	4.76299e-06	0.017257
s-helix	SELA	2.88668e-05	0.0490226
s-helix	GSSG	5.48099e-06	0.017257
dd-sheet	VLWN	6.82525e-05	0.0302049
dd-sheet	TGSV	0.000211558	0.0465232
dd-sheet	KVGN	0.00024335	0.049616
dd-sheet	GNEY	6.82525e-05	0.0302049
dd-sheet	LYIP	0.000176092	0.0433708
dd-sheet	GTVT	5.50529e-05	0.0302049
dd-sheet	GTVL	7.09204e-05	0.0303254
dd-sheet	GTVE	0.000211558	0.0465232
dd-sheet	DEEG	6.96576e-05	0.0302049
dd-sheet	ASID	0.000132865	0.0407909
dd-sheet	HMDE	3.95667e-05	0.0264755
dd-sheet	EGEV	6.66399e-06	0.011398
dd-sheet	EGEG	3.32007e-06	0.00851792
dd-sheet	ITNT	0.000165951	0.0433708
dd-sheet	ILVD	0.000211558	0.0465232
dd-sheet	VSLN	0.000211558	0.0465232
dd-sheet	IDAN	0.000201841	0.0465232
dd-sheet	VDDN	0.000108911	0.0399171
dd-sheet	CFML	3.95667e-05	0.0264755
dd-sheet	QGDH	0.000176092	0.0433708
dd-sheet	WQGE	5.29376e-05	0.0301813
dd-sheet	VEVN	9.10406e-05	0.0350358
dd-sheet	TPYG	0.000165951	0.0433708
dd-sheet	EQGL	0.000236168	0.049616
dd-sheet	GVVY	0.000236168	0.049616
dd-sheet	GEYT	0.000201841	0.0465232
dd-sheet	GHGM	9.01161e-05	0.0350358
dd-sheet	ETIS	6.96576e-05	0.0302049
dd-sheet	FENG	9.88129e-06	0.013541
dd-sheet	ITVN	0.000236168	0.049616
dd-sheet	TITN	2.04781e-05	0.0197018
dd-sheet	NGVV	6.96576e-05	0.0302049
dd-sheet	VIDD	0.000117482	0.0407909
dd-sheet	DGQY	8.67664e-05	0.0350358
dd-sheet	DGQD	0.000108911	0.0399171
dd-sheet	VENG	9.05696e-07	0.00398338
dd-sheet	DGIT	3.90615e-05	0.0264755
dd-sheet	STCE	0.000176092	0.0433708
dd-sheet	FLFE	5.29376e-05	0.0301813
dd-sheet	AEIT	0.000211558	0.0465232
dd-sheet	GDGS	5.92338e-06	0.0107322
dd-sheet	FSSV	0.000117482	0.0407909
dd-sheet	TGNV	0.000189058	0.0454728
dd-sheet	GSYT	3.90615e-05	0.0264755
dd-sheet	DHPF	5.29376e-05	0.0301813
dd-sheet	HGWD	0.000127954	0.0407909
dd-sheet	FQTT	6.82525e-05	0.0302049
dd-sheet	SCSV	8.67664e-05	0.0350358
dd-sheet	VQGP	0.00024335	0.049616
dd-sheet	GYVY	1.62825e-06	0.00501289
dd-sheet	DGLM	0.00024335	0.049616
dd-sheet	SVID	0.000168529	0.0433708
dd-sheet	SVIE	0.00014984	0.0433708
dd-sheet	DGTV	5.32083e-07	0.00273021
dd-sheet	EVNG	3.90615e-05	0.0264755
dd-sheet	IDVT	0.000132865	0.0407909
dd-sheet	VTVD	0.000117482	0.0407909
dd-sheet	TVNG	0.000168529	0.0433708
dd-sheet	YIGH	0.000127954	0.0407909
dd-sheet	IETP	0.000135144	0.0407909
dd-sheet	DGQV	1.43902e-05	0.0152769
dd-sheet	GEVV	2.82104e-06	0.00789557
dd-sheet	FTLE	0.000132865	0.0407909
dd-sheet	LVID	0.000189058	0.0454728
dd-sheet	ISSE	0.000189058	0.0454728
dd-sheet	VDGE	2.0205e-07	0.00207351
dd-sheet	VVID	1.01161e-05	0.013541
dd-sheet	EGQY	0.000236049	0.049616
dd-sheet	DGSV	4.15023e-07	0.00255546
dd-sheet	EYQG	2.41516e-05	0.0218693
dd-sheet	PDGT	6.00434e-09	0.000184856
dd-sheet	QQGE	0.00024335	0.049616
dd-sheet	GGVT	8.88351e-05	0.0350358
dd-sheet	EGIY	0.000165951	0.0433708
dd-sheet	AGTN	0.00024335	0.049616
dd-sheet	KPYS	0.000176092	0.0433708
dd-sheet	KDGE	2.85462e-05	0.0235937
dd-sheet	SHEG	0.000176092	0.0433708
dd-sheet	NGYV	1.43902e-05	0.0152769
dd-sheet	NGYP	0.000201841	0.0465232
dd-sheet	GSGT	9.38597e-06	0.013541
dd-sheet	EPSG	0.000165951	0.0433708
dd-sheet	ISPD	0.000211558	0.0465232
dd-sheet	NCVL	6.11174e-05	0.0302049
dd-sheet	YLHV	0.000108911	0.0399171
dd-sheet	SISY	6.06187e-05	0.0302049
dd-sheet	GTEV	0.000103578	0.0393685
dd-sheet	DGNV	3.90615e-05	0.0264755
dd-sheet	GHEF	5.29376e-05	0.0301813
dd-sheet	GTMY	0.000176092	0.0433708
dd-sheet	LNGT	0.000211558	0.0465232
dd-sheet	TVTY	0.00024335	0.049616
dd-sheet	TVTV	4.6115e-05	0.0295779
dd-sheet	TVTM	0.000135144	0.0407909
dd-sheet	TVTG	2.63522e-05	0.0225362
dd-sheet	SGQV	6.96576e-05	0.0302049
dd-sheet	GDHY	0.000176092	0.0433708
dd-sheet	KFGS	0.000127954	0.0407909
dd-sheet	EGNV	1.43902e-05	0.0152769
dd-sheet	TVLV	6.52134e-05	0.0302049
dd-sheet	SWDG	6.11174e-05	0.0302049
dd-sheet	DGQQ	6.82525e-05	0.0302049
dd-sheet	LDGG	5.14982e-06	0.0107322
dd-sheet	VALD	0.000116411	0.0407909
dd-sheet	VALY	0.000211558	0.0465232
dd-sheet	IHGH	3.03181e-05	0.0239334
dd-sheet	SADG	3.85503e-06	0.00912959
dd-sheet	EITL	7.78302e-06	0.0126114
dd-sheet	VTQH	4.0418e-05	0.0264755
dd-sheet	TLEV	5.92614e-06	0.0107322
dd-sheet	HNGE	0.000127954	0.0407909
dd-sheet	VNGH	0.000165951	0.0433708
dd-sheet	VNGE	1.26018e-06	0.0043108
dd-sheet	RQQG	0.000236049	0.049616
dd-sheet	WTLT	0.000135144	0.0407909
dd-sheet	SDDG	3.34661e-05	0.025758
dd-sheet	NDGF	0.000165951	0.0433708
dd-sheet	EVGG	6.96576e-05	0.0302049
dd-sheet	GEVY	5.25614e-05	0.0301813
dd-sheet	DDGS	0.000168529	0.0433708
dd-sheet	SGSG	0.000150805	0.0433708
dd-sheet	IDGE	1.43902e-05	0.0152769
dd-sheet	GNVT	0.00014984	0.0433708
dd-sheet	YQLH	0.000176092	0.0433708
dd-sheet	GSVV	2.91214e-05	0.0235937
dd-sheet	GQVI	6.96576e-05	0.0302049
dd-sheet	IEGS	5.25614e-05	0.0301813
dd-sheet	IEGN	1.1961e-05	0.0147298
dd-sheet	DDTV	1.1961e-05	0.0147298
dd-sheet	RISI	0.000135144	0.0407909
dd-sheet	TPDG	1.01161e-05	0.013541
dd-sheet	LTVT	1.77983e-05	0.0182652
dd-sheet	KVEV	2.04781e-05	0.0197018
dd-sheet	LPDG	5.50529e-05	0.0302049
dd-sheet	SPDG	2.63522e-05	0.0225362
dd-sheet	GVTV	2.40147e-05	0.0218693
dd-sheet	NVVI	5.92614e-06	0.0107322
dd-sheet	NGEF	0.000201841	0.0465232
dd-sheet	NGEW	0.000165951	0.0433708
dd-sheet	LVEP	6.06187e-05	0.0302049
dd-sheet	QDHL	0.000127954	0.0407909
dd-sheet	DGGL	0.000168529	0.0433708
dd-sheet	HGNV	8.20599e-08	0.00126319
dd-sheet	RFIL	8.67664e-05	0.0350358
dd-sheet	ANGE	9.10406e-05	0.0350358
dd-sheet	NTMT	0.000127954	0.0407909
dd-sheet	ENGE	4.07547e-07	0.00255546
dd-sheet	ENGT	1.26018e-06	0.0043108
dd-sheet	TGDI	0.000132865	0.0407909
dd-sheet	WNLN	9.01161e-05	0.0350358
dd-sheet	WDGS	0.000176092	0.0433708
random	EELF	8.72338e-06	0.0236715
random	EELL	2.66083e-09	0.000115525
random	LEQL	1.97546e-05	0.0428844
random	LEGE	2.57417e-05	0.0465678
random	LAQA	6.89327e-07	0.00997617
random	ALAD	2.96649e-08	0.000643981
random	ALAE	2.20957e-05	0.0452612
random	LLEN	8.71544e-06	0.0236715
random	VEEL	5.37329e-06	0.017257
random	ELAQ	2.04635e-06	0.0126782
random	LTEE	2.92011e-06	0.0126782
random	ALLN	1.78756e-05	0.0408477
random	ELLI	2.93569e-05	0.0490226
random	ELLA	9.86728e-06	0.0252004
random	ELLT	2.4177e-05	0.0456388
random	LEEE	2.49227e-06	0.0126782
random	VLAQ	2.74202e-06	0.0126782
random	TLAE	1.61252e-05	0.0388948
random	LEEL	1.10991e-06	0.0101097
random	LTDE	1.16425e-06	0.0101097
random	EGFL	5.56459e-06	0.017257
random	LTLE	2.74202e-06	0.0126782
random	IAEN	2.29345e-05	0.0452612
random	EQAI	4.76299e-06	0.017257
random	SELA	2.88668e-05	0.0490226
random	GSSG	5.48099e-06	0.017257
krtm-sheet	EELF	8.72338e-06	0.0236715
krtm-sheet	EELL	2.66083e-09	0.000115525
krtm-sheet	LEQL	1.97546e-05	0.0428844
krtm-sheet	LEGE	2.57417e-05	0.0465678
krtm-sheet	LAQA	6.89327e-07	0.00997617
krtm-sheet	ALAD	2.96649e-08	0.000643981
krtm-sheet	ALAE	2.20957e-05	0.0452612
krtm-sheet	LLEN	8.71544e-06	0.0236715
krtm-sheet	VEEL	5.37329e-06	0.017257
krtm-sheet	ELAQ	2.04635e-06	0.0126782
krtm-sheet	LTEE	2.92011e-06	0.0126782
krtm-sheet	ALLN	1.78756e-05	0.0408477
krtm-sheet	ELLI	2.93569e-05	0.0490226
krtm-sheet	ELLA	9.86728e-06	0.0252004
krtm-sheet	ELLT	2.4177e-05	0.0456388
krtm-sheet	LEEE	2.49227e-06	0.0126782
krtm-sheet	VLAQ	2.74202e-06	0.0126782
krtm-sheet	TLAE	1.61252e-05	0.0388948
krtm-sheet	LEEL	1.10991e-06	0.0101097
krtm-sheet	LTDE	1.16425e-06	0.0101097
krtm-sheet	EGFL	5.56459e-06	0.017257
krtm-sheet	LTLE	2.74202e-06	0.0126782
krtm-sheet	IAEN	2.29345e-05	0.0452612
krtm-sheet	EQAI	4.76299e-06	0.017257
krtm-sheet	SELA	2.88668e-05	0.0490226
krtm-sheet	GSSG	5.48099e-06	0.017257
dc-helix	EELF	8.72338e-06	0.0236715
dc-helix	EELL	2.66083e-09	0.000115525
dc-helix	LEQL	1.97546e-05	0.0428844
dc-helix	LEGE	2.57417e-05	0.0465678
dc-helix	LAQA	6.89327e-07	0.00997617
dc-helix	ALAD	2.96649e-08	0.000643981
dc-helix	ALAE	2.20957e-05	0.0452612
dc-helix	LLEN	8.71544e-06	0.0236715
dc-helix	VEEL	5.37329e-06	0.017257
dc-helix	ELAQ	2.04635e-06	0.0126782
dc-helix	LTEE	2.92011e-06	0.0126782
dc-helix	ALLN	1.78756e-05	0.0408477
dc-helix	ELLI	2.93569e-05	0.0490226
dc-helix	ELLA	9.86728e-06	0.0252004
dc-helix	ELLT	2.4177e-05	0.0456388
dc-helix	LEEE	2.49227e-06	0.0126782
dc-helix	VLAQ	2.74202e-06	0.0126782
dc-helix	TLAE	1.61252e-05	0.0388948
dc-helix	LEEL	1.10991e-06	0.0101097
dc-helix	LTDE	1.16425e-06	0.0101097
dc-helix	EGFL	5.56459e-06	0.017257
dc-helix	LTLE	2.74202e-06	0.0126782
dc-helix	IAEN	2.29345e-05	0.0452612
dc-helix	EQAI	4.76299e-06	0.017257
dc-helix	SELA	2.88668e-05	0.0490226
dc-helix	GSSG	5.48099e-06	0.017257
tm-helix	EELF	8.72338e-06	0.0236715
tm-helix	EELL	2.66083e-09	0.000115525
tm-helix	LEQL	1.97546e-05	0.0428844
tm-helix	LEGE	2.57417e-05	0.0465678
tm-helix	LAQA	6.89327e-07	0.00997617
tm-helix	ALAD	2.96649e-08	0.000643981
tm-helix	ALAE	2.20957e-05	0.0452612
tm-helix	LLEN	8.71544e-06	0.0236715
tm-helix	VEEL	5.37329e-06	0.017257
tm-helix	ELAQ	2.04635e-06	0.0126782
tm-helix	LTEE	2.92011e-06	0.0126782
tm-helix	ALLN	1.78756e-05	0.0408477
tm-helix	ELLI	2.93569e-05	0.0490226
tm-helix	ELLA	9.86728e-06	0.0252004
tm-helix	ELLT	2.4177e-05	0.0456388
tm-helix	LEEE	2.49227e-06	0.0126782
tm-helix	VLAQ	2.74202e-06	0.0126782
tm-helix	TLAE	1.61252e-05	0.0388948
tm-helix	LEEL	1.10991e-06	0.0101097
tm-helix	LTDE	1.16425e-06	0.0101097
tm-helix	EGFL	5.56459e-06	0.017257
tm-helix	LTLE	2.74202e-06	0.0126782
tm-helix	IAEN	2.29345e-05	0.0452612
tm-helix	EQAI	4.76299e-06	0.017257
tm-helix	SELA	2.88668e-05	0.0490226
tm-helix	GSSG	5.48099e-06	0.017257
dc-sheet	VLWN	6.82525e-05	0.0302049
dc-sheet	TGSV	0.000211558	0.0465232
dc-sheet	KVGN	0.00024335	0.049616
dc-sheet	GNEY	6.82525e-05	0.0302049
dc-sheet	LYIP	0.000176092	0.0433708
dc-sheet	GTVT	5.50529e-05	0.0302049
dc-sheet	GTVL	7.09204e-05	0.0303254
dc-sheet	GTVE	0.000211558	0.0465232
dc-sheet	DEEG	6.96576e-05	0.0302049
dc-sheet	ASID	0.000132865	0.0407909
dc-sheet	HMDE	3.95667e-05	0.0264755
dc-sheet	EGEV	6.66399e-06	0.011398
dc-sheet	EGEG	3.32007e-06	0.00851792
dc-sheet	ITNT	0.000165951	0.0433708
dc-sheet	ILVD	0.000211558	0.0465232
dc-sheet	VSLN	0.000211558	0.0465232
dc-sheet	IDAN	0.000201841	0.0465232
dc-sheet	VDDN	0.000108911	0.0399171
dc-sheet	CFML	3.95667e-05	0.0264755
dc-sheet	QGDH	0.000176092	0.0433708
dc-sheet	WQGE	5.29376e-05	0.0301813
dc-sheet	VEVN	9.10406e-05	0.0350358
dc-sheet	TPYG	0.000165951	0.0433708
dc-sheet	EQGL	0.000236168	0.049616
dc-sheet	GVVY	0.000236168	0.049616
dc-sheet	GEYT	0.000201841	0.0465232
dc-sheet	GHGM	9.01161e-05	0.0350358
dc-sheet	ETIS	6.96576e-05	0.0302049
dc-sheet	FENG	9.88129e-06	0.013541
dc-sheet	ITVN	0.000236168	0.049616
dc-sheet	TITN	2.04781e-05	0.0197018
dc-sheet	NGVV	6.96576e-05	0.0302049
dc-sheet	VIDD	0.000117482	0.0407909
dc-sheet	DGQY	8.67664e-05	0.0350358
dc-sheet	DGQD	0.000108911	0.0399171
dc-sheet	VENG	9.05696e-07	0.00398338
dc-sheet	DGIT	3.90615e-05	0.0264755
dc-sheet	STCE	0.000176092	0.0433708
dc-sheet	FLFE	5.29376e-05	0.0301813
dc-sheet	AEIT	0.000211558	0.0465232
dc-sheet	GDGS	5.92338e-06	0.0107322
dc-sheet	FSSV	0.000117482	0.0407909
dc-sheet	TGNV	0.000189058	0.0454728
dc-sheet	GSYT	3.90615e-05	0.0264755
dc-sheet	DHPF	5.29376e-05	0.0301813
dc-sheet	HGWD	0.000127954	0.0407909
dc-sheet	FQTT	6.82525e-05	0.0302049
dc-sheet	SCSV	8.67664e-05	0.0350358
dc-sheet	VQGP	0.00024335	0.049616
dc-sheet	GYVY	1.62825e-06	0.00501289
dc-sheet	DGLM	0.00024335	0.049616
dc-sheet	SVID	0.000168529	0.0433708
dc-sheet	SVIE	0.00014984	0.0433708
dc-sheet	DGTV	5.32083e-07	0.00273021
dc-sheet	EVNG	3.90615e-05	0.0264755
dc-sheet	IDVT	0.000132865	0.0407909
dc-sheet	VTVD	0.000117482	0.0407909
dc-sheet	TVNG	0.000168529	0.0433708
dc-sheet	YIGH	0.000127954	0.0407909
dc-sheet	IETP	0.000135144	0.0407909
dc-sheet	DGQV	1.43902e-05	0.0152769
dc-sheet	GEVV	2.82104e-06	0.00789557
dc-sheet	FTLE	0.000132865	0.0407909
dc-sheet	LVID	0.000189058	0.0454728
dc-sheet	ISSE	0.000189058	0.0454728
dc-sheet	VDGE	2.0205e-07	0.00207351
dc-sheet	VVID	1.01161e-05	0.013541
dc-sheet	EGQY	0.000236049	0.049616
dc-sheet	DGSV	4.15023e-07	0.00255546
dc-sheet	EYQG	2.41516e-05	0.0218693
dc-sheet	PDGT	6.00434e-09	0.000184856
dc-sheet	QQGE	0.00024335	0.049616
dc-sheet	GGVT	8.88351e-05	0.0350358
dc-sheet	EGIY	0.000165951	0.0433708
dc-sheet	AGTN	0.00024335	0.049616
dc-sheet	KPYS	0.000176092	0.0433708
dc-sheet	KDGE	2.85462e-05	0.0235937
dc-sheet	SHEG	0.000176092	0.0433708
dc-sheet	NGYV	1.43902e-05	0.0152769
dc-sheet	NGYP	0.000201841	0.0465232
dc-sheet	GSGT	9.38597e-06	0.013541
dc-sheet	EPSG	0.000165951	0.0433708
dc-sheet	ISPD	0.000211558	0.0465232
dc-sheet	NCVL	6.11174e-05	0.0302049
dc-sheet	YLHV	0.000108911	0.0399171
dc-sheet	SISY	6.06187e-05	0.0302049
dc-sheet	GTEV	0.000103578	0.0393685
dc-sheet	DGNV	3.90615e-05	0.0264755
dc-sheet	GHEF	5.29376e-05	0.0301813
dc-sheet	GTMY	0.000176092	0.0433708
dc-sheet	LNGT	0.000211558	0.0465232
dc-sheet	TVTY	0.00024335	0.049616
dc-sheet	TVTV	4.6115e-05	0.0295779
dc-sheet	TVTM	0.000135144	0.0407909
dc-sheet	TVTG	2.63522e-05	0.0225362
dc-sheet	SGQV	6.96576e-05	0.0302049
dc-sheet	GDHY	0.000176092	0.0433708
dc-sheet	KFGS	0.000127954	0.0407909
dc-sheet	EGNV	1.43902e-05	0.0152769
dc-sheet	TVLV	6.52134e-05	0.0302049
dc-sheet	SWDG	6.11174e-05	0.0302049
dc-sheet	DGQQ	6.82525e-05	0.0302049
dc-sheet	LDGG	5.14982e-06	0.0107322
dc-sheet	VALD	0.000116411	0.0407909
dc-sheet	VALY	0.000211558	0.0465232
dc-sheet	IHGH	3.03181e-05	0.0239334
dc-sheet	SADG	3.85503e-06	0.00912959
dc-sheet	EITL	7.78302e-06	0.0126114
dc-sheet	VTQH	4.0418e-05	0.0264755
dc-sheet	TLEV	5.92614e-06	0.0107322
dc-sheet	HNGE	0.000127954	0.0407909
dc-sheet	VNGH	0.000165951	0.0433708
dc-sheet	VNGE	1.26018e-06	0.0043108
dc-sheet	RQQG	0.000236049	0.049616
dc-sheet	WTLT	0.000135144	0.0407909
dc-sheet	SDDG	3.34661e-05	0.025758
dc-sheet	NDGF	0.000165951	0.0433708
dc-sheet	EVGG	6.96576e-05	0.0302049
dc-sheet	GEVY	5.25614e-05	0.0301813
dc-sheet	DDGS	0.000168529	0.0433708
dc-sheet	SGSG	0.000150805	0.0433708
dc-sheet	IDGE	1.43902e-05	0.0152769
dc-sheet	GNVT	0.00014984	0.0433708
dc-sheet	YQLH	0.000176092	0.0433708
dc-sheet	GSVV	2.91214e-05	0.0235937
dc-sheet	GQVI	6.96576e-05	0.0302049
dc-sheet	IEGS	5.25614e-05	0.0301813
dc-sheet	IEGN	1.1961e-05	0.0147298
dc-sheet	DDTV	1.1961e-05	0.0147298
dc-sheet	RISI	0.000135144	0.0407909
dc-sheet	TPDG	1.01161e-05	0.013541
dc-sheet	LTVT	1.77983e-05	0.0182652
dc-sheet	KVEV	2.04781e-05	0.0197018
dc-sheet	LPDG	5.50529e-05	0.0302049
dc-sheet	SPDG	2.63522e-05	0.0225362
dc-sheet	GVTV	2.40147e-05	0.0218693
dc-sheet	NVVI	5.92614e-06	0.0107322
dc-sheet	NGEF	0.000201841	0.0465232
dc-sheet	NGEW	0.000165951	0.0433708
dc-sheet	LVEP	6.06187e-05	0.0302049
dc-sheet	QDHL	0.000127954	0.0407909
dc-sheet	DGGL	0.000168529	0.0433708
dc-sheet	HGNV	8.20599e-08	0.00126319
dc-sheet	RFIL	8.67664e-05	0.0350358
dc-sheet	ANGE	9.10406e-05	0.0350358
dc-sheet	NTMT	0.000127954	0.0407909
dc-sheet	ENGE	4.07547e-07	0.00255546
dc-sheet	ENGT	1.26018e-06	0.0043108
dc-sheet	TGDI	0.000132865	0.0407909
dc-sheet	WNLN	9.01161e-05	0.0350358
dc-sheet	WDGS	0.000176092	0.0433708
dd-helix	EELF	8.72338e-06	0.0236715
dd-helix	EELL	2.66083e-09	0.000115525
dd-helix	LEQL	1.97546e-05	0.0428844
dd-helix	LEGE	2.57417e-05	0.0465678
dd-helix	LAQA	6.89327e-07	0.00997617
dd-helix	ALAD	2.96649e-08	0.000643981
dd-helix	ALAE	2.20957e-05	0.0452612
dd-helix	LLEN	8.71544e-06	0.0236715
dd-helix	VEEL	5.37329e-06	0.017257
dd-helix	ELAQ	2.04635e-06	0.0126782
dd-helix	LTEE	2.92011e-06	0.0126782
dd-helix	ALLN	1.78756e-05	0.0408477
dd-helix	ELLI	2.93569e-05	0.0490226
dd-helix	ELLA	9.86728e-06	0.0252004
dd-helix	ELLT	2.4177e-05	0.0456388
dd-helix	LEEE	2.49227e-06	0.0126782
dd-helix	VLAQ	2.74202e-06	0.0126782
dd-helix	TLAE	1.61252e-05	0.0388948
dd-helix	LEEL	1.10991e-06	0.0101097
dd-helix	LTDE	1.16425e-06	0.0101097
dd-helix	EGFL	5.56459e-06	0.017257
dd-helix	LTLE	2.74202e-06	0.0126782
dd-helix	IAEN	2.29345e-05	0.0452612
dd-helix	EQAI	4.76299e-06	0.017257
dd-helix	SELA	2.88668e-05	0.0490226
dd-helix	GSSG	5.48099e-06	0.017257
no-helix	EELF	8.72338e-06	0.0236715
no-helix	EELL	2.66083e-09	0.000115525
no-helix	LEQL	1.97546e-05	0.0428844
no-helix	LEGE	2.57417e-05	0.0465678
no-helix	LAQA	6.89327e-07	0.00997617
no-helix	ALAD	2.96649e-08	0.000643981
no-helix	ALAE	2.20957e-05	0.0452612
no-helix	LLEN	8.71544e-06	0.0236715
no-helix	VEEL	5.37329e-06	0.017257
no-helix	ELAQ	2.04635e-06	0.0126782
no-helix	LTEE	2.92011e-06	0.0126782
no-helix	ALLN	1.78756e-05	0.0408477
no-helix	ELLI	2.93569e-05	0.0490226
no-helix	ELLA	9.86728e-06	0.0252004
no-helix	ELLT	2.4177e-05	0.0456388
no-helix	LEEE	2.49227e-06	0.0126782
no-helix	VLAQ	2.74202e-06	0.0126782
no-helix	TLAE	1.61252e-05	0.0388948
no-helix	LEEL	1.10991e-06	0.0101097
no-helix	LTDE	1.16425e-06	0.0101097
no-helix	EGFL	5.56459e-06	0.017257
no-helix	LTLE	2.74202e-06	0.0126782
no-helix	IAEN	2.29345e-05	0.0452612
no-helix	EQAI	4.76299e-06	0.017257
no-helix	SELA	2.88668e-05	0.0490226
no-helix	GSSG	5.48099e-06	0.017257
no-sheet	VLWN	6.82525e-05	0.0302049
no-sheet	TGSV	0.000211558	0.0465232
no-sheet	KVGN	0.00024335	0.049616
no-sheet	GNEY	6.82525e-05	0.0302049
no-sheet	LYIP	0.000176092	0.0433708
no-sheet	GTVT	5.50529e-05	0.0302049
no-sheet	GTVL	7.09204e-05	0.0303254
no-sheet	GTVE	0.000211558	0.0465232
no-sheet	DEEG	6.96576e-05	0.0302049
no-sheet	ASID	0.000132865	0.0407909
no-sheet	HMDE	3.95667e-05	0.0264755
no-sheet	EGEV	6.66399e-06	0.011398
no-sheet	EGEG	3.32007e-06	0.00851792
no-sheet	ITNT	0.000165951	0.0433708
no-sheet	ILVD	0.000211558	0.0465232
no-sheet	VSLN	0.000211558	0.0465232
no-sheet	IDAN	0.000201841	0.0465232
no-sheet	VDDN	0.000108911	0.0399171
no-sheet	CFML	3.95667e-05	0.0264755
no-sheet	QGDH	0.000176092	0.0433708
no-sheet	WQGE	5.29376e-05	0.0301813
no-sheet	VEVN	9.10406e-05	0.0350358
no-sheet	TPYG	0.000165951	0.0433708
no-sheet	EQGL	0.000236168	0.049616
no-sheet	GVVY	0.000236168	0.049616
no-sheet	GEYT	0.000201841	0.0465232
no-sheet	GHGM	9.01161e-05	0.0350358
no-sheet	ETIS	6.96576e-05	0.0302049
no-sheet	FENG	9.88129e-06	0.013541
no-sheet	ITVN	0.000236168	0.049616
no-sheet	TITN	2.04781e-05	0.0197018
no-sheet	NGVV	6.96576e-05	0.0302049
no-sheet	VIDD	0.000117482	0.0407909
no-sheet	DGQY	8.67664e-05	0.0350358
no-sheet	DGQD	0.000108911	0.0399171
no-sheet	VENG	9.05696e-07	0.00398338
no-sheet	DGIT	3.90615e-05	0.0264755
no-sheet	STCE	0.000176092	0.0433708
no-sheet	FLFE	5.29376e-05	0.0301813
no-sheet	AEIT	0.000211558	0.0465232
no-sheet	GDGS	5.92338e-06	0.0107322
no-sheet	FSSV	0.000117482	0.0407909
no-sheet	TGNV	0.000189058	0.0454728
no-sheet	GSYT	3.90615e-05	0.0264755
no-sheet	DHPF	5.29376e-05	0.0301813
no-sheet	HGWD	0.000127954	0.0407909
no-sheet	FQTT	6.82525e-05	0.0302049
no-sheet	SCSV	8.67664e-05	0.0350358
no-sheet	VQGP	0.00024335	0.049616
no-sheet	GYVY	1.62825e-06	0.00501289
no-sheet	DGLM	0.00024335	0.049616
no-sheet	SVID	0.000168529	0.0433708
no-sheet	SVIE	0.00014984	0.0433708
no-sheet	DGTV	5.32083e-07	0.00273021
no-sheet	EVNG	3.90615e-05	0.0264755
no-sheet	IDVT	0.000132865	0.0407909
no-sheet	VTVD	0.000117482	0.0407909
no-sheet	TVNG	0.000168529	0.0433708
no-sheet	YIGH	0.000127954	0.0407909
no-sheet	IETP	0.000135144	0.0407909
no-sheet	DGQV	1.43902e-05	0.0152769
no-sheet	GEVV	2.82104e-06	0.00789557
no-sheet	FTLE	0.000132865	0.0407909
no-sheet	LVID	0.000189058	0.0454728
no-sheet	ISSE	0.000189058	0.0454728
no-sheet	VDGE	2.0205e-07	0.00207351
no-sheet	VVID	1.01161e-05	0.013541
no-sheet	EGQY	0.000236049	0.049616
no-sheet	DGSV	4.15023e-07	0.00255546
no-sheet	EYQG	2.41516e-05	0.0218693
no-sheet	PDGT	6.00434e-09	0.000184856
no-sheet	QQGE	0.00024335	0.049616
no-sheet	GGVT	8.88351e-05	0.0350358
no-sheet	EGIY	0.000165951	0.0433708
no-sheet	AGTN	0.00024335	0.049616
no-sheet	KPYS	0.000176092	0.0433708
no-sheet	KDGE	2.85462e-05	0.0235937
no-sheet	SHEG	0.000176092	0.0433708
no-sheet	NGYV	1.43902e-05	0.0152769
no-sheet	NGYP	0.000201841	0.0465232
no-sheet	GSGT	9.38597e-06	0.013541
no-sheet	EPSG	0.000165951	0.0433708
no-sheet	ISPD	0.000211558	0.0465232
no-sheet	NCVL	6.11174e-05	0.0302049
no-sheet	YLHV	0.000108911	0.0399171
no-sheet	SISY	6.06187e-05	0.0302049
no-sheet	GTEV	0.000103578	0.0393685
no-sheet	DGNV	3.90615e-05	0.0264755
no-sheet	GHEF	5.29376e-05	0.0301813
no-sheet	GTMY	0.000176092	0.0433708
no-sheet	LNGT	0.000211558	0.0465232
no-sheet	TVTY	0.00024335	0.049616
no-sheet	TVTV	4.6115e-05	0.0295779
no-sheet	TVTM	0.000135144	0.0407909
no-sheet	TVTG	2.63522e-05	0.0225362
no-sheet	SGQV	6.96576e-05	0.0302049
no-sheet	GDHY	0.000176092	0.0433708
no-sheet	KFGS	0.000127954	0.0407909
no-sheet	EGNV	1.43902e-05	0.0152769
no-sheet	TVLV	6.52134e-05	0.0302049
no-sheet	SWDG	6.11174e-05	0.0302049
no-sheet	DGQQ	6.82525e-05	0.0302049
no-sheet	LDGG	5.14982e-06	0.0107322
no-sheet	VALD	0.000116411	0.0407909
no-sheet	VALY	0.000211558	0.0465232
no-sheet	IHGH	3.03181e-05	0.0239334
no-sheet	SADG	3.85503e-06	0.00912959
no-sheet	EITL	7.78302e-06	0.0126114
no-sheet	VTQH	4.0418e-05	0.0264755
no-sheet	TLEV	5.92614e-06	0.0107322
no-sheet	HNGE	0.000127954	0.0407909
no-sheet	VNGH	0.000165951	0.0433708
no-sheet	VNGE	1.26018e-06	0.0043108
no-sheet	RQQG	0.000236049	0.049616
no-sheet	WTLT	0.000135144	0.0407909
no-sheet	SDDG	3.34661e-05	0.025758
no-sheet	NDGF	0.000165951	0.0433708
no-sheet	EVGG	6.96576e-05	0.0302049
no-sheet	GEVY	5.25614e-05	0.0301813
no-sheet	DDGS	0.000168529	0.0433708
no-sheet	SGSG	0.000150805	0.0433708
no-sheet	IDGE	1.43902e-05	0.0152769
no-sheet	GNVT	0.00014984	0.0433708
no-sheet	YQLH	0.000176092	0.0433708
no-sheet	GSVV	2.91214e-05	0.0235937
no-sheet	GQVI	6.96576e-05	0.0302049
no-sheet	IEGS	5.25614e-05	0.0301813
no-sheet	IEGN	1.1961e-05	0.0147298
no-sheet	DDTV	1.1961e-05	0.0147298
no-sheet	RISI	0.000135144	0.0407909
no-sheet	TPDG	1.01161e-05	0.013541
no-sheet	LTVT	1.77983e-05	0.0182652
no-sheet	KVEV	2.04781e-05	0.0197018
no-sheet	LPDG	5.50529e-05	0.0302049
no-sheet	SPDG	2.63522e-05	0.0225362
no-sheet	GVTV	2.40147e-05	0.0218693
no-sheet	NVVI	5.92614e-06	0.0107322
no-sheet	NGEF	0.000201841	0.0465232
no-sheet	NGEW	0.000165951	0.0433708
no-sheet	LVEP	6.06187e-05	0.0302049
no-sheet	QDHL	0.000127954	0.0407909
no-sheet	DGGL	0.000168529	0.0433708
no-sheet	HGNV	8.20599e-08	0.00126319
no-sheet	RFIL	8.67664e-05	0.0350358
no-sheet	ANGE	9.10406e-05	0.0350358
no-sheet	NTMT	0.000127954	0.0407909
no-sheet	ENGE	4.07547e-07	0.00255546
no-sheet	ENGT	1.26018e-06	0.0043108
no-sheet	TGDI	0.000132865	0.0407909
no-sheet	WNLN	9.01161e-05	0.0350358
no-sheet	WDGS	0.000176092	0.0433708
